# Supplementary material
Source: PubMed Central journal article supplement (PMC3891587)
Supplement: NIHMS543977-supplement-Supplemental_Table_1.pdf [file NIHMS543977-supplement-Supplemental_Table_1.pdf]

**Supplemental Table 1**

| <b>Genes that function in biofilm development</b> |                                                 |                                                                                                                                                                                                        |               |            |
|---------------------------------------------------|-------------------------------------------------|--------------------------------------------------------------------------------------------------------------------------------------------------------------------------------------------------------|---------------|------------|
| Gene                                              | Molecular function of gene product <sup>a</sup> | Mutant phenotype <sup>b</sup>                                                                                                                                                                          | Filamentation | Reference  |
| <i>ACE2</i>                                       | Transcription factor                            | <i>ace2</i> <sup>-</sup> : severe biofilm defect; aberrant hyphae formation                                                                                                                            | Aberrant      | 118        |
| <i>ADH1</i>                                       | Alcohol dehydrogenase                           | <i>adh1</i> <sup>-</sup> : increased biofilm biomass                                                                                                                                                   | Normal        | 30         |
| <i>ADH5</i>                                       | Alcohol dehydrogenase                           | <i>ADH5</i> -oe: increased biofilm matrix                                                                                                                                                              | Normal        | 127        |
| <i>ALS1</i>                                       | Cell wall protein                               | <i>als1</i> - <i>als3</i> : severe biofilm defect. <i>ALS1</i> -oe: restores defect in <i>bcr1</i> -biofilm                                                                                            | Normal        | 22, 28     |
| <i>ALS2</i>                                       | Cell wall protein                               | <i>als2</i> <sup>+/-</sup> : defect in biofilm formation and hyphae formation. <i>ALS2</i> -oe: partially restores <i>als1</i> - <i>als3</i> - biofilm defect                                          | Aberrant      | 22, 123    |
| <i>ALS3</i>                                       | Cell wall protein                               | <i>als3</i> <sup>-</sup> : reduced biofilm formation. <i>als1</i> - <i>als3</i> <sup>-</sup> : severe biofilm defect in vitro. <i>ALS3</i> -oe: restores biofilm in <i>bcr1</i> - and in <i>efg1</i> - | Normal        | 22, 28, 71 |
| <i>ALS4</i>                                       | Cell wall protein                               | <i>ALS4</i> -oe: partially restores defects in <i>als1</i> - <i>als3</i> -biofilm                                                                                                                      | Normal        | 22         |
| <i>ALS5</i>                                       | Cell wall protein                               | <i>ALS5</i> -oe: partially restores defects in <i>als1</i> - <i>als3</i> -biofilm                                                                                                                      | Normal        | 22         |
| <i>ALS7</i>                                       | Cell wall protein                               | <i>ALS7</i> -oe: partially restores defects in <i>als1</i> - <i>als3</i> -biofilm                                                                                                                      | Normal        | 22         |

|             |                             |                                                                                                   |           |        |
|-------------|-----------------------------|---------------------------------------------------------------------------------------------------|-----------|--------|
| <i>ALS9</i> | Cell wall protein           | <i>ALS9</i> -oe: partially restores defects in <i>als1-</i> <i>als3</i> -biofilm                  | Normal    | 22     |
| <i>BCR1</i> | Transcription factor        | <i>bcr1-</i> : severe biofilm defect. <i>BCR1</i> -oe: partially restores biofilm in <i>tec1-</i> | Normal    | 27, 28 |
| <i>CAT2</i> | Carnitine acetyltransferase | <i>cat2-</i> : reduced biofilm formation and biofilm thickness                                    | Normal    | 131    |
| <i>CBK1</i> | Protein Kinase              | <i>cbk1-</i> : severe biofilm defect and defective hyphae formation                               | Defective | 78     |
| <i>CDR1</i> | Drug efflux pump            | <i>cdr1-</i> : inhibited biofilm growth in the presence of azoles                                 | Normal    | 89     |
| <i>CDR2</i> | Drug efflux pump            | <i>cdr2-</i> : inhibited biofilm growth in the presence of azoles                                 | Normal    | 89     |
| <i>CHK1</i> | Histidine kinase            | <i>chk1-</i> : forms farnesol-resistant biofilm                                                   | Normal    | 129    |
| <i>CPH1</i> | Transcription factor        | <i>cph1-</i> <i>efg1-</i> : thin biofilm with reduce number of hyphae                             | Normal    | 119    |
| <i>CSA1</i> | Cell wall protein           | <i>csa1-</i> : defect in biofilm formation; additive with <i>pga10-</i> and <i>rbt5-</i>          | Normal    | 74     |
| <i>CSH1</i> | Aryl-alcohol dehydrogenase  | <i>CSH1</i> -oe: decreased biofilm matrix in <i>zap1-</i>                                         | Normal    | 29     |
| <i>CZF1</i> | Transcription factor        | <i>czf1-</i> : defect in biofilm formation. Aberrant hyphae                                       | Aberrant  | 120    |
| <i>EAP1</i> | Cell wall protein           | <i>eap1-</i> : severe defect in biofilm formation                                                 | Normal    | 56     |

|             |                                 |                                                                                                                     |           |         |
|-------------|---------------------------------|---------------------------------------------------------------------------------------------------------------------|-----------|---------|
| <i>ECE1</i> | Putative trans-membrane protein | <i>ECE1</i> -oe: restores defect in <i>bcr1</i> -biofilm                                                            | Normal    | 28      |
| <i>EFG1</i> | Transcription factor            | <i>efg1</i> -: severe biofilm defect and hyphae formation                                                           | Defective | 14, 121 |
| <i>FKS1</i> | Beta-1,3 glucan synthase        | <i>fks1</i> / <i>FKS1</i> : reduced matrix production, reduce biofilm resistance to fluconazole                     | Normal    | 97      |
| <i>FLO8</i> | Transcription factor            | <i>czf1</i> -: defect in biofilm formation. Defective hyphae formation                                              | Defective | 122     |
| <i>GCA1</i> | Glucosylase                     | <i>GCA1</i> -oe: increased biofilm matrix                                                                           | Normal    | 29      |
| <i>GCA2</i> | Glucosylase                     | <i>GCA2</i> -oe: increased biofilm matrix                                                                           | Normal    | 29      |
| <i>GCN4</i> | Transcription factor            | <i>gcn4</i> -: decreased biofilm biomass                                                                            | Normal    | 90      |
| <i>GIN4</i> | Protein Kinase                  | <i>gin4</i> -: severe biofilm defect; defective hyphae                                                              | Defective | 78      |
| <i>HWP1</i> | Cell wall protein               | <i>hwp1</i> -: defect in biofilm formation and hyphal formation. <i>HWP1</i> -oe: restores biofilm in <i>bcr1</i> - | Defective | 23, 28  |
| <i>HWP2</i> | Cell wall protein               | <i>hwp2</i> -: decreased biomass                                                                                    | Defective | 67      |
| <i>IFD6</i> | Aryl-alcohol dehydrogenase      | <i>IFD6</i> -oe: decreased biofilm matrix in <i>zap1</i> -                                                          | Normal    | 29      |
| <i>IRE1</i> | Protein Kinase                  | <i>ire1</i> -: severe biofilm defect and hyphae formation                                                           | Defective | 78      |
| <i>KEM1</i> | Exo-RNase                       | <i>kem1</i> -: severe medium-dependent defect in biofilm formation                                                  | Defective | 132     |

|              |                                                                      |                                                                                          |           |     |
|--------------|----------------------------------------------------------------------|------------------------------------------------------------------------------------------|-----------|-----|
|              |                                                                      | and hyphal formation                                                                     |           |     |
| <i>MDR1</i>  | Drug efflux pump                                                     | <i>mdr1-</i> : inhibited biofilm growth in the presence of azoles                        | Normal    | 89  |
| <i>MDS3</i>  | Unknown                                                              | <i>mds3-</i> : severe medium-dependent defect in biofilm formation and hyphal formation  | Defective | 132 |
| <i>MKC1</i>  | MAP Kinase                                                           | <i>mkc1-</i> : defective biofilm, with reduced filamentation                             | Normal    | 64  |
| <i>NDH51</i> | Subunit of nicotinamide adenine dinucleotide dehydrogenase complex I | <i>ndh51-</i> : decreased biofilm mass                                                   | Normal    | 133 |
| <i>NRG1</i>  | Transcription factor                                                 | <i>nrg1-</i> : decreased release of dispersal cells                                      | Aberrant  | 99  |
| <i>NUP85</i> | Nuclear pore protein                                                 | <i>nup85-</i> : severe medium-dependent defect in biofilm formation and hyphal formation | Defective | 132 |
| <i>OCH1</i>  | Alpha-1,6-mannosyltransferase                                        | <i>och1-</i> : defect in biofilm formation. Cellular aggregation, cell wall defects      | Normal    | 38  |
| <i>PBR1</i>  | Unknown                                                              | <i>pbr1-</i> : forms a thin biofilm with reduced matrix production                       | Normal    | 68  |
| <i>PES1</i>  | Pescadillo homolog                                                   | <i>pes1-</i> : reduced cell dispersion<br><i>PES1-oe</i> : increased cell dispersion     | Normal    | 98  |
| <i>PDX1</i>  | Pyruvate dehydrogenase                                               | <i>pdx1-</i> : biofilm with reduced density                                              | Normal    | 133 |

|              |                              |                                                                                                                                               |           |        |
|--------------|------------------------------|-----------------------------------------------------------------------------------------------------------------------------------------------|-----------|--------|
| <i>PGA1</i>  | Cell wall protein            | <i>pga1-</i> : reduced metabolic activity                                                                                                     | Normal    | 124    |
| <i>PGA10</i> | Cell wall protein            | <i>pga10-</i> : defect in biofilm formation; additive with <i>rbt5-</i> and <i>csa1-</i>                                                      | Aberrant  | 74     |
| <i>PMT1</i>  | Mannosyltransferase          | <i>pmt1-</i> : biofilm with reduced biomass. Defective hyphae                                                                                 | Defective | 125    |
| <i>PMT2</i>  | mannosyltransferase          | <i>pmt2-/+</i> : biofilm with reduced biomass. Defective hyphae                                                                               | Defective | 125    |
| <i>PMT4</i>  | Mannosyltransferase          | <i>pmt4-</i> : moderate defect in biofilm formation                                                                                           | Normal    | 125    |
| <i>PMT6</i>  | Mannosyltransferase          | <i>pmt6-</i> : moderate defect in biofilm formation                                                                                           | Normal    | 125    |
| <i>RBT1</i>  | Cell wall protein            | <i>rbt1-</i> : reduced biomass                                                                                                                | Normal    | 67     |
| <i>RBT5</i>  | Cell wall protein            | <i>rbt5-</i> : defect in biofilm formation; additive with <i>pga10-</i> and <i>csa1-</i><br><i>RBT5-oe</i> : restores biofilm in <i>bcr1-</i> | Normal    | 28, 74 |
| <i>RIX7</i>  | AAA ATPase                   | <i>rix7+/-</i> : defect in biofilm formation                                                                                                  | Normal    | 134    |
| <i>SUN41</i> | Cell wall protein            | <i>sun41-</i> : severe biofilm defect; aberrant hyphae                                                                                        | Aberrant  | 75     |
| <i>SUV3</i>  | Mito-chondrial RNA helicase  | <i>suv3-</i> : severe medium-dependent defect in biofilm formation and hyphae formation                                                       | Defective | 132    |
| <i>TEC1</i>  | Transcription factor         | <i>tec1-</i> : severe biofilm defect and hyphae formation                                                                                     | Defective | 27     |
| <i>TOR1</i>  | Phosphatidylinositol kinases | Rapamycin treatment inhibits <i>TOR1</i> resulting in decreased                                                                               | Defective | 130    |

|             |                                        |                                                                                                             |           |                |
|-------------|----------------------------------------|-------------------------------------------------------------------------------------------------------------|-----------|----------------|
|             |                                        | adhesion of cells and loss of filamentation                                                                 |           |                |
| <i>UME6</i> | Transcription factor                   | <i>ume6-</i> : reduced biomass biofilm and defective hyphae formation. Increased cell release from biofilm. | Defective | <sup>98</sup>  |
| <i>VAM3</i> | Vacuolar trafficking                   | <i>vam3-</i> : biofilm defect, fragile biofilm, reduced biomass and abnormal hyphae                         | Aberrant  | <sup>135</sup> |
| <i>VPS1</i> | Dynamain-family GTPase-related protein | <i>vps1-</i> : rudimentary biofilm composed primarily of yeast and pseudohyphal                             | Aberrant  | <sup>136</sup> |
| <i>YAK1</i> | Protein Kinase                         | <i>yak1-</i> : severe biofilm defect and hyphal formation                                                   | Defective | <sup>128</sup> |
| <i>YWP1</i> | Cell wall protein                      | <i>ywp1-</i> : increased adhesion. Biofilm formation by only yeast-form cells                               | Normal    | <sup>126</sup> |
| <i>ZAP1</i> | Transcription factor                   | <i>zap1-</i> : increased production of biofilm matrix                                                       | Normal    | <sup>29</sup>  |

Footnotes:

**a.** Molecular functions have been inferred from protein sequence homology in most cases.

**b.** Mutant phenotype was observed with either homozygous loss-of-function alleles (e.g., *als1-* refers to an *als1/als1* homozygous mutant) or over-expression alleles (e.g., *ALS1-oe* refers to a strain in which one *ALS1* allele has been fused to a strong promoter). The strains which have *-/+* after the gene indicate a heterozygous genotype. The "*als2+/-*" is a heterozygous strain which has reduced but not abolished *ALS2* expression. Negative results (absence of a phenotype) are omitted.

**c.** The ability to filament was record as "Normal" for those mutants able to form hyphae, "Defective" for those unable to form hyphae, or "Aberrant" for those with an intermediate phenotype.
